# Supplementary material
Source: publisher site journal article supplement (https://www.dovepress.com/article/559124)
Supplement: Supplementary file 1 [file 559124%20Supplementary%20Material.docx]

Supplementary Table 1 List of Detected Genes in the Present Study

| *ANKRD26* | *ASXL1* | *BCOR* | *BCORL1* | *BRAF* | *CBL* |
| --- | --- | --- | --- | --- | --- |
| *CEBPA* | *CSF3R* | *DDX41* | *DNMT3A* | *ETV6* | *EZH2* |
| *FLT3* | *GATA2* | *IDH1* | *IDH2* | *JAK2* | *KIT* |
| *KRAS* | *NF1* | *NPM1* | *NRAS* | *PHF6* | *PPM1D* |
| *PTPN11* | *RAD21* | *RUNX1* | *SETBP1* | *SF3B1* | *SRSF2* |
| *STAG2* | *TET2* | *TP53* | *U2AF1* | *WT1* | *ZRSR2* |


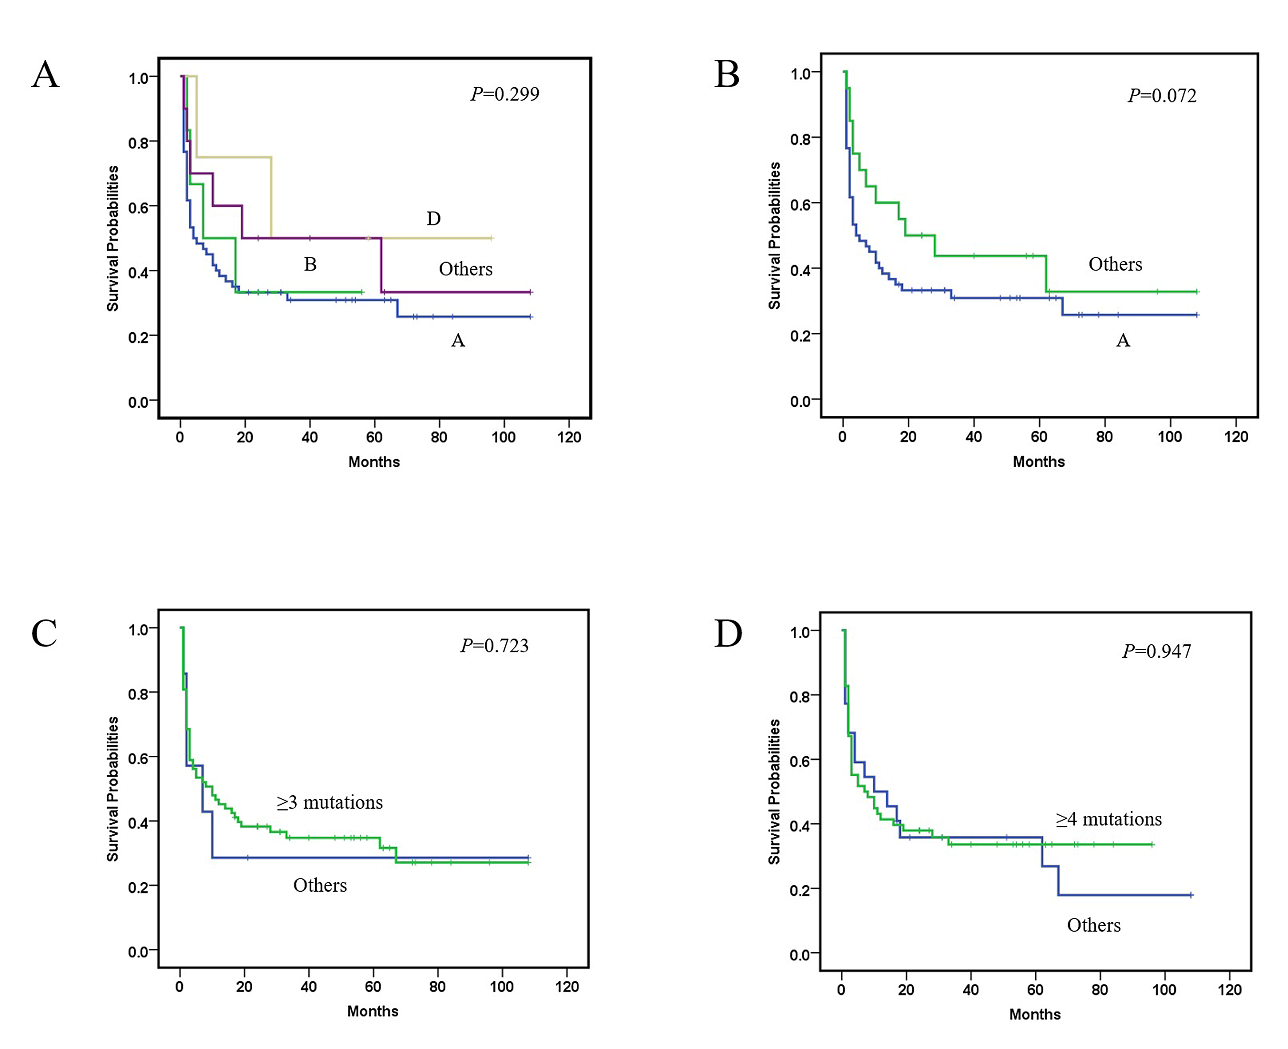


**Supplementary Figure 1** Kaplan-Meier plots of overall survival (OS) in *NPM1*-mutated acute myeloid leukemia (AML) patients stratified by different variables. (**A**) Stratification by *NPM1* mutation subtypes: curves are shown for subgroups “A(blue)”, “B(green)”, “D(yellow)”, and “Others(purple)”, with the Breslow test yielding a *P*-value of 0.299, indicating no statistically significant survival difference among these subgroups. (**B**) Stratification by *NPM1* mutation subtypes: survival curves compare patients in subgroup A with those in the "Others" group. A *P*-value of 0.072 suggests no significant survival divergence between the two groups. (**C**) The group with “≥3 mutations” (green) was compared with the “Others” group (blue). With a *P*-value of 0.723, there is no statistically significant OS difference between these two groups. (**D**) The group with “≥4 mutations” (green) was compared with the “Others” group (blue). With a *P*-value of 0.947, there is no statistically significant OS difference between these two groups.


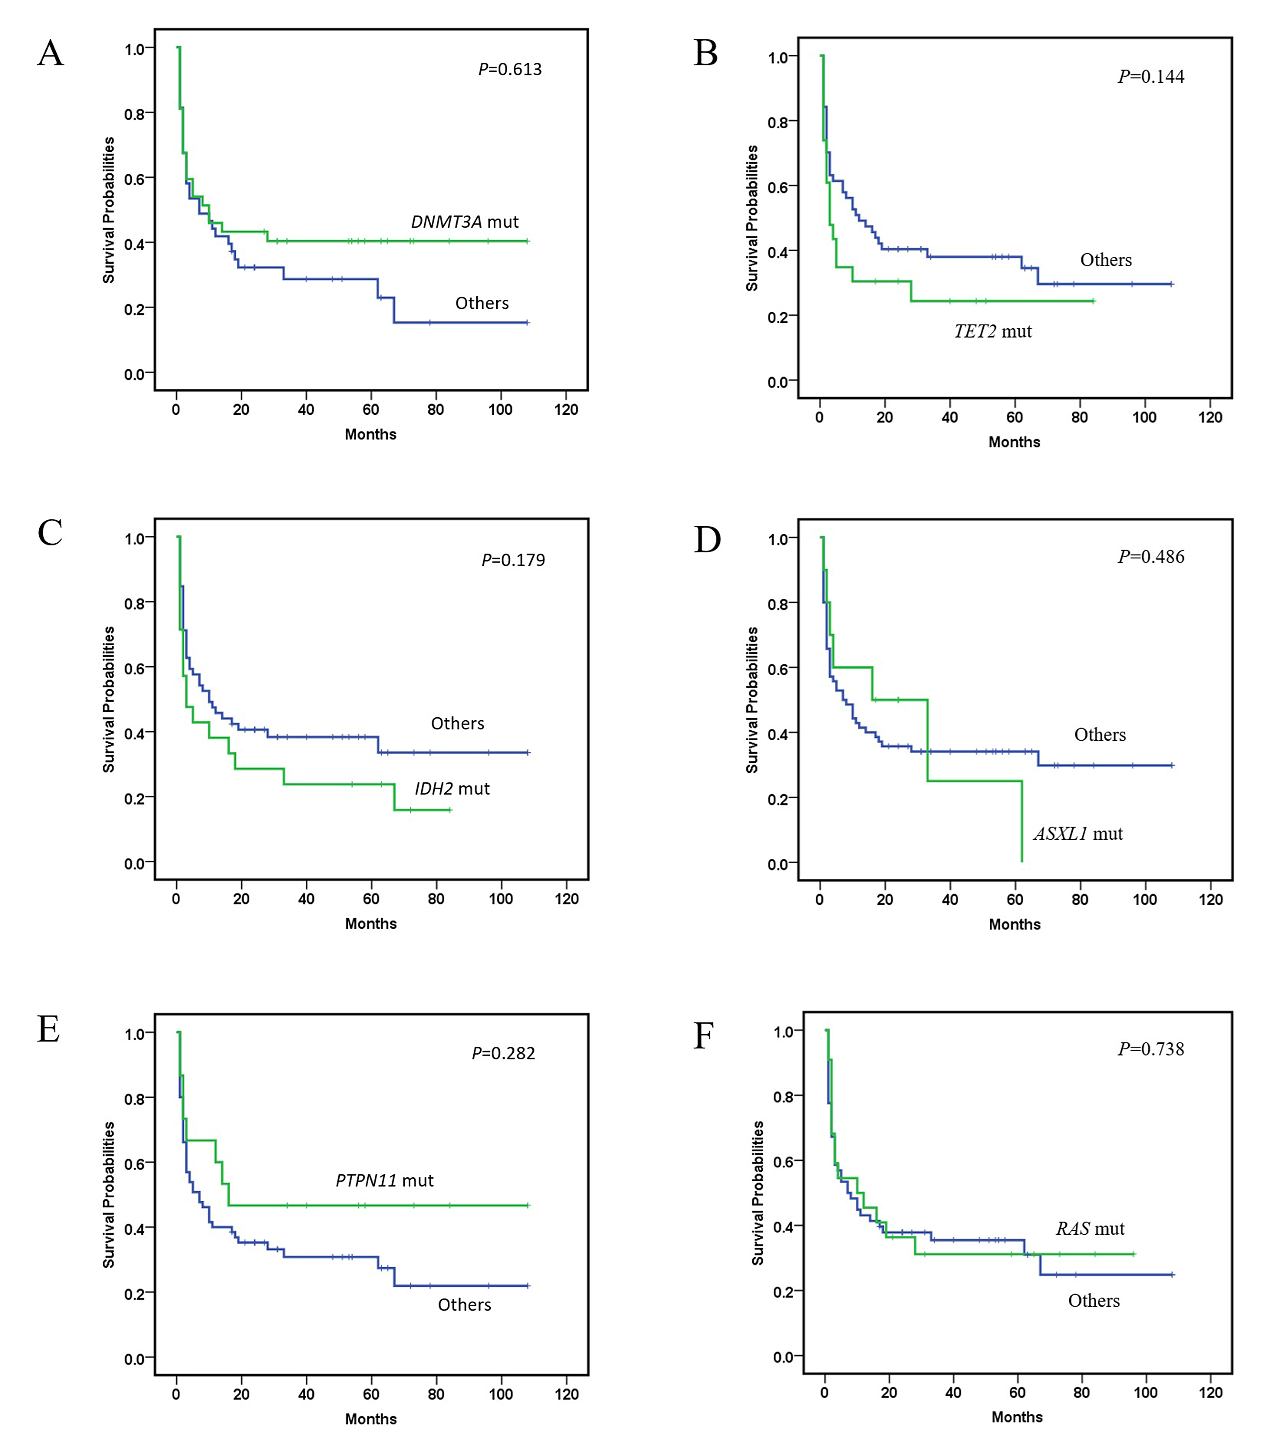


**Supplementary Figure 2** Survival Analysis of Myeloid-Related Gene Mutations in *NPM1*-Mutated Acute Myeloid Leukemia (AML).(**A**) Kaplan-Meier analysis of overall survival (OS) stratified by *DNMT3A* mutation status (*DNMT3A* mut, green). The Breslow *P*-value was 0.613, suggesting no statistically significant OS difference. (**B**) OS analysis based on *TET2* mutation status (*TET2* mut, green) yielded a *P*-value of 0.144, indicating no significant OS disparity. (**C**) Evaluation of *IDH2* mutation status (*IDH2* mut, green) showed a *P*-value of 0.179, with no significant OS difference observed. (**D**) Analysis of *ASXL1* mutation status (*ASXL1* mut, green) resulted in a *P*-value of 0.486, implying no significant OS variation. (**E**) Assessment of *PTPN11* mutation status (*PTPN11* mut, green) gave a *P*-value of 0.282, showing no significant OS difference. (**F**) OS analysis stratified by *RAS* mutation status (*RAS* mut, green) had a *P*-value of 0.738, indicating no statistically significant OS difference between the groups.


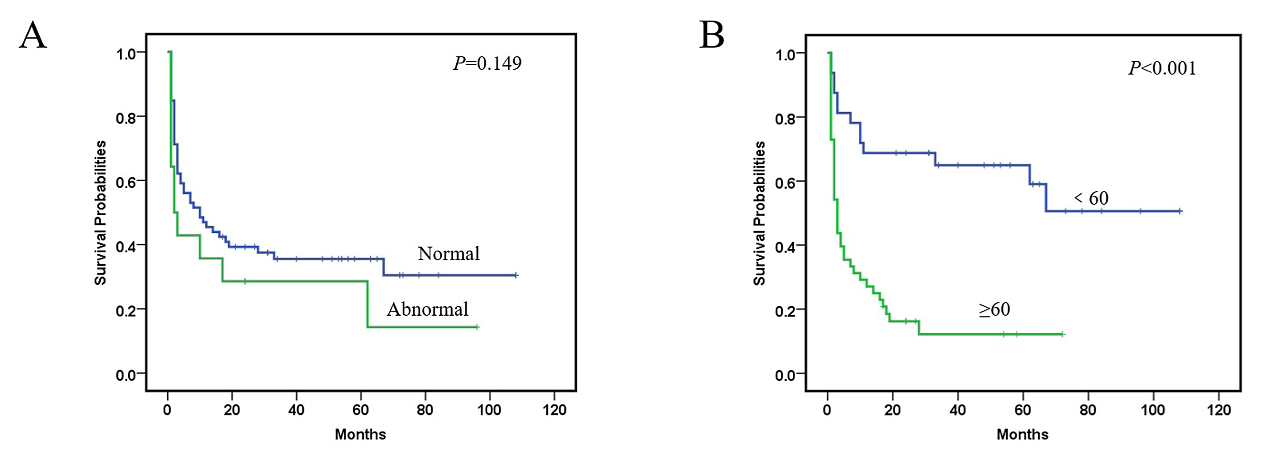


**Supplementary Figure 3** Survival Analysis of Karyotype and Age in *NPM1*-Mutated Acute Myeloid Leukemia (AML). (**A**) Stratification by karyotype status: curves contrast patients with the cytogenetically normal group (Normal) and the cytogenetically abnormal group (Abnormal), and with a *P*-value of 0.149, no significant survival distinction is observed. (**B**) Stratification by age: survival probabilities are compared for patients < 60 years old (< 60ys) and those ≥ 60 years old (≥ 60ys), and a *P*-value < 0.001 denotes a highly significant survival difference, with younger patients exhibiting better survival.
